# Supplementary material for: Solubility design leading to high figure of merit in low-cost Ce-CoSb3 skutterudites
Source: PubMed Central journal article supplement (PMC4518255; doi:10.1038/ncomms8584), 2015-07-20
Supplement: ncomms8584-s1.pdf [file ncomms8584-s1.pdf]

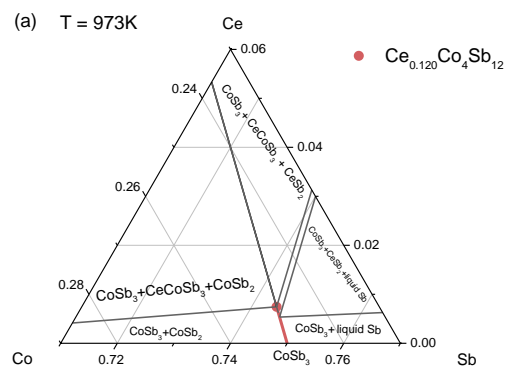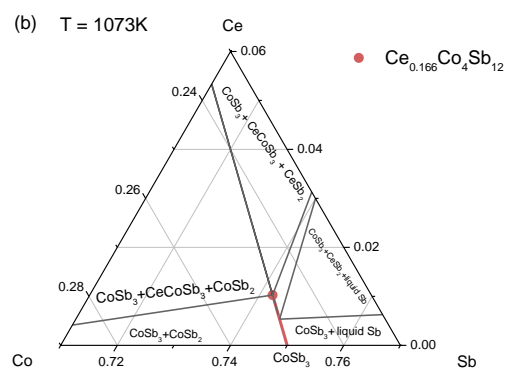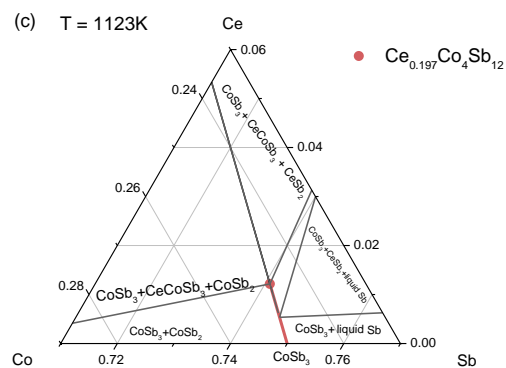

**Supplementary Figure 1.** Isothermal sections of Ce-Co-Sb phase diagram at various temperatures. The length of the red line represents the solubility of Ce in  $\text{CoSb}_3$  skutterudite system which is determined from EPMA analysis. The point at which the three-phase region ( $\text{CoSb}_3 + \text{CeSb}_2 + \text{liquid Sb}$ ) is in contact with the skutterudite phase region (red line) in both (b) and (c) is chosen to be the same as in (a) due to lack of further information.

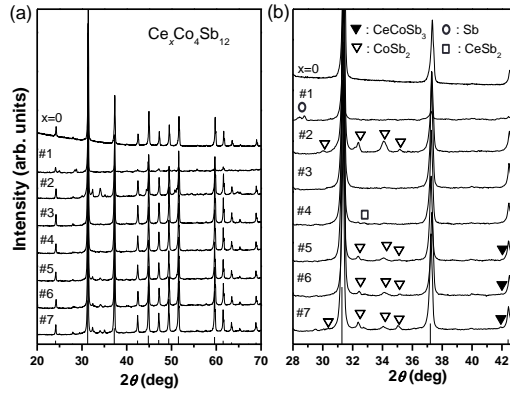

**Supplementary Figure 2.** X-ray diffraction (XRD) patterns. (a) XRD patterns of undoped  $CoSb_3$  and the Ce-doped skutterudites annealed at 973K with nominal compositions #1  $Ce_{0.05}Co_{3.8}Sb_{12.2}$ , #2  $Ce_{0.05}Co_{4.2}Sb_{11.8}$ , #3  $Ce_{0.1}Co_4Sb_{12}$ , #4  $Ce_{0.2}Co_{3.96}Sb_{12.04}$ , #5  $Ce_{0.15}Co_4Sb_{12}$ , #6  $Ce_{0.2}Co_4Sb_{12}$ , and #7  $Ce_{0.3}Co_4Sb_{12}$ . (b) Magnification of the XRD patterns in (a).

(a)  $\text{Ce}_{0.05}\text{Co}_{3.8}\text{Sb}_{12.2}$

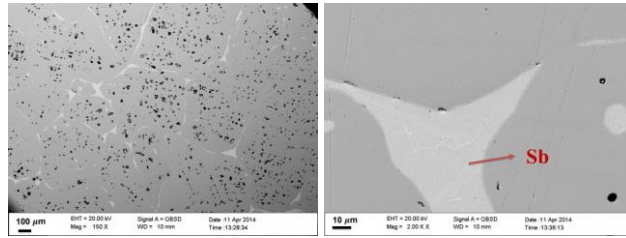

(b)  $\text{Ce}_{0.05}\text{Co}_{4.2}\text{Sb}_{11.8}$

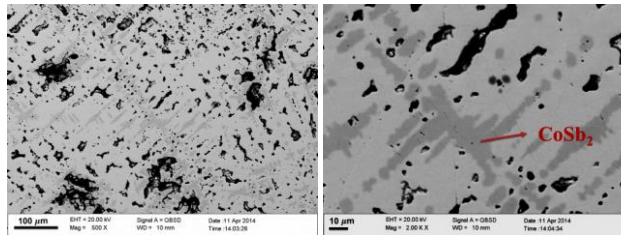

(c)  $\text{Ce}_{0.1}\text{Co}_4\text{Sb}_{12}$

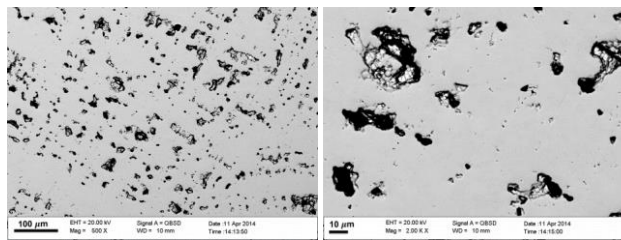

(d)  $\text{Ce}_{0.2}\text{Co}_{3.96}\text{Sb}_{12.04}$

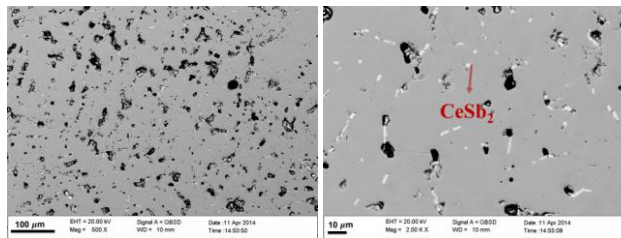

(e)  $\text{Ce}_{0.5}\text{Co}_{4.2}\text{Sb}_{11.8}$

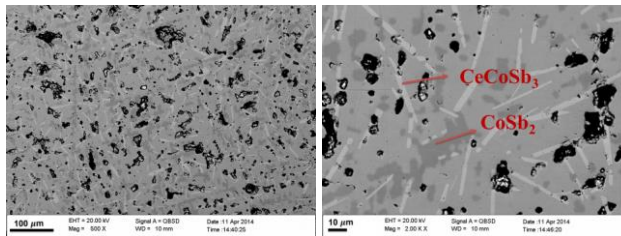

(f)  $\text{Ce}_{0.5}\text{Co}_{3.9}\text{Sb}_{12.1}$

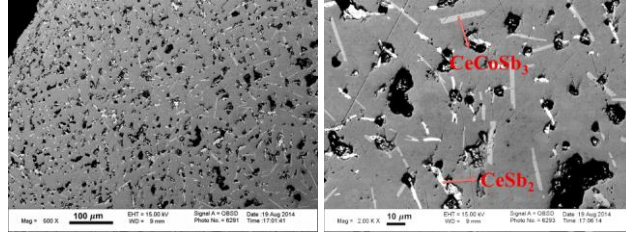

(g)  $\text{Ce}_{0.3}\text{Co}_4\text{Sb}_{12}$

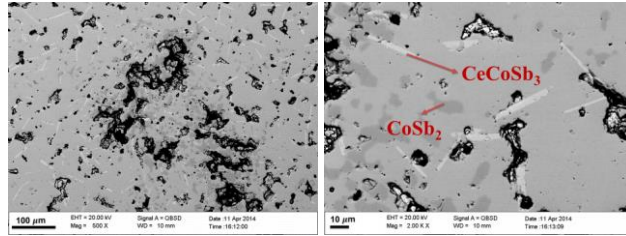

**Supplementary Figure 3.** Scanning electron microscope (SEM) images of samples annealed at 973K. Black regions are holes formed by thermal contraction during quenching. Scale bars are either in  $100\mu\text{m}$  (left) or  $10\mu\text{m}$  (right).

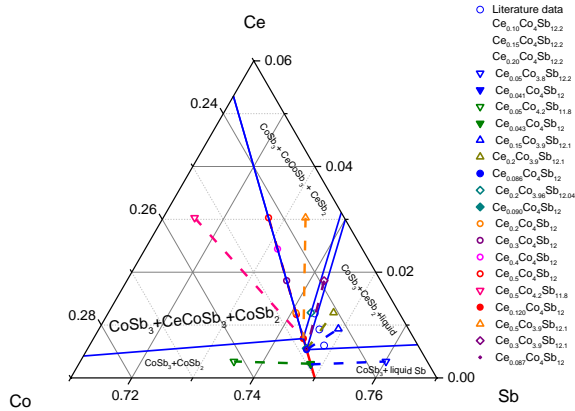

**Supplementary Figure 4.** Isothermal section of Ce-Co-Sb phase diagram at 973K with more sample details. A comparison between nominal compositions and actual EPMA compositions are shown more clearly in Supplementary Table 1 below.

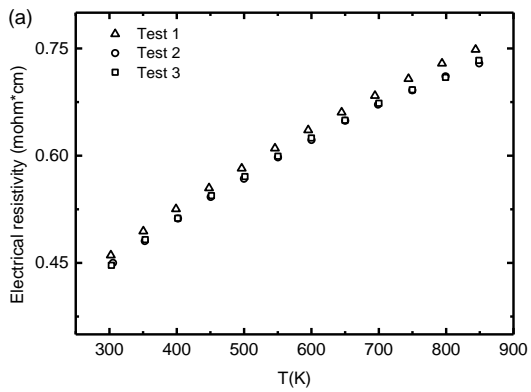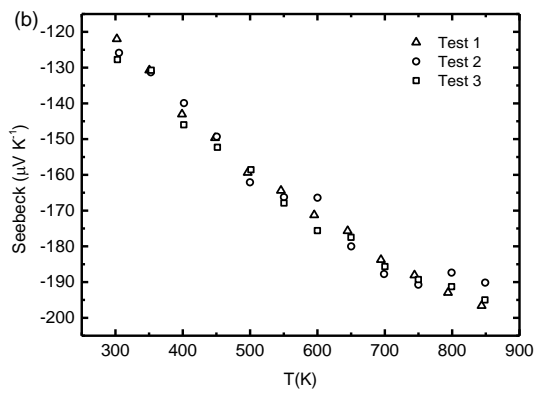

**Supplementary Figure 5.** Repeatability of thermoelectric properties of Ce-containing skutterudite  $\text{Ce}_x\text{Co}_4\text{Sb}_{12}$  with doping level  $x = 0.14$  higher than solubility limit at testing temperatures.

**Supplementary Table 1.** Actual Ce content in the skutterudite phase estimated by EPMA for Ce-containing skutterudites with different nominal compositions and annealing temperatures. Black, magenta and red boldface Ce contents correspond to the stable skutterudite composition represented as a red point in Supplementary Figure 1(a), (b) and (c) respectively. Blue Ce contents correspond to the stable skutterudite composition represented as a blue point in Figure 3(c).

| Samples                                              | Annealing | EPMA                                |
|------------------------------------------------------|-----------|-------------------------------------|
|                                                      | T(K)      | Ce content                          |
| $\text{Ce}_{0.05}\text{Co}_{3.8}\text{Sb}_{12.2}$    | 973       | $0.041 \pm 0.009$                   |
| $\text{Ce}_{0.05}\text{Co}_{4.2}\text{Sb}_{11.8}$    | 973       | $0.043 \pm 0.005$                   |
| $\text{Ce}_{0.05}\text{Co}_4\text{Sb}_{12}$          | 973       | $0.088 \pm 0.006$                   |
| $\text{Ce}_{0.5}\text{Co}_4\text{Sb}_{12}$           | 973       | <b><math>0.120 \pm 0.005</math></b> |
|                                                      | 1073      | <b><math>0.165 \pm 0.013</math></b> |
|                                                      | 1123      | <b><math>0.197 \pm 0.011</math></b> |
| $\text{Ce}_{0.5}\text{Co}_{4.2}\text{Sb}_{11.8}$     | 973       | <b><math>0.121 \pm 0.004</math></b> |
|                                                      | 1073      | <b><math>0.169 \pm 0.010</math></b> |
|                                                      | 1123      | <b><math>0.195 \pm 0.007</math></b> |
| $\text{Ce}_{0.4}\text{Co}_4\text{Sb}_{12}$           | 973       | <b><math>0.122 \pm 0.005</math></b> |
|                                                      | 1073      | <b><math>0.165 \pm 0.013</math></b> |
|                                                      | 1123      | <b><math>0.196 \pm 0.010</math></b> |
| $\text{Ce}_{0.3}\text{Co}_4\text{Sb}_{12}$           | 973       | <b><math>0.121 \pm 0.004</math></b> |
| $\text{Ce}_{0.2}\text{Co}_4\text{Sb}_{12}$           | 973       | <b><math>0.119 \pm 0.004</math></b> |
| $\text{Ce}_{0.5}\text{Co}_{4.05}\text{Sb}_{11.95}$   | 973       | <b><math>0.118 \pm 0.005</math></b> |
| $\text{Ce}_{0.5}\text{Co}_{3.995}\text{Sb}_{12.005}$ | 973       | <b><math>0.123 \pm 0.003</math></b> |
| $\text{Ce}_{0.5}\text{Co}_{3.95}\text{Sb}_{12.05}$   | 973       | <b><math>0.122 \pm 0.005</math></b> |
| $\text{Ce}_{0.5}\text{Co}_{3.9}\text{Sb}_{12.1}$     | 973       | <b><math>0.120 \pm 0.006</math></b> |

|                                                    |      |                                     |
|----------------------------------------------------|------|-------------------------------------|
| $\text{Ce}_{0.2}\text{Co}_{3.96}\text{Sb}_{12.04}$ | 973  | $0.088 \pm 0.05$                    |
| $\text{Ce}_{0.15}\text{Co}_{3.9}\text{Sb}_{12.1}$  | 973  | <b><math>0.080 \pm 0.009</math></b> |
|                                                    | 1073 | $0.097 \pm 0.024$                   |
|                                                    | 1123 | $0.106 \pm 0.017$                   |
| $\text{Ce}_{0.2}\text{Co}_{3.9}\text{Sb}_{12.1}$   | 973  | <b><math>0.090 \pm 0.007</math></b> |
|                                                    | 1073 | $0.111 \pm 0.027$                   |
|                                                    | 1123 | $0.133 \pm 0.014$                   |
| $\text{Ce}_{0.3}\text{Co}_{3.9}\text{Sb}_{12.1}$   | 973  | <b><math>0.087 \pm 0.007</math></b> |
